## Thermal stability and muscle efficiency in hovering orchid bees (Apidae: Euglossini)

Brendan J. Borrell<sup>\*,†</sup> and Matthew J. Medeiros<sup>\*</sup>

*Section of Integrative Biology, University of Texas, Austin, TX 78712, USA*

<sup>\*</sup>Present address: Department of Integrative Biology, University of California, Berkeley, CA 94720, USA

<sup>†</sup>Author for correspondence at present address (e-mail: bborrell@berkeley.edu)

Accepted 2 June 2004

### Summary

To test whether variation in muscle efficiency contributes to thermal stability during flight in the orchid bee, *Euglossa imperialis*, we measured CO<sub>2</sub> production, heat loss and flight kinematics at different air temperatures ( $T_a$ ). We also examined the relationship between wingbeat frequency (*WBF*) and  $T_a$  in five additional species of orchid bees. Mean thoracic temperature ( $T_{th}$ ) for *Eg. imperialis* hovering in a screened insectary and in the field was  $39.3 \pm 0.77^\circ\text{C}$  (mean  $\pm$  95% C.I.), and the slope of  $T_{th}$  on  $T_a$  was 0.57. Head and abdominal temperature excess ratios declined with  $T_a$ , indicating that *Eg. imperialis* were not increasing heat dissipation from the thorax at high  $T_a$ . Elevation of  $T_{th}$  above  $T_a$  was correlated with *WBF*, but  $T_{th}$  alone was not. Estimates of heat production from both respirometry and

heat loss experiments decreased 33% as  $T_a$  rose from 24 to 34°C. Mean muscle efficiency over this temperature range was 18% assuming perfect elastic energy storage and 22% assuming zero elastic energy storage. Both efficiency estimates increased significantly as  $T_a$  rose from 24 to 34°C. In all six species examined, *WBF* declined significantly with  $T_a$ . These data indicate that hovering orchid bees regulate heat production through changes in wingbeat kinematics and consequent changes in energy conversion by the flight motor. Temperature-dependent variation in elastic energy storage or muscle contraction efficiency or both may contribute to the observed trends.

Key words: flight energetics, thermoregulation, muscle, power, efficiency, bee, *Euglossa imperialis*, Euglossini.

### Introduction

Muscles convert chemical energy into mechanical work, and a byproduct of this process is the release of heat energy (Hill, 1938). Although heat represents inefficiency of muscle contraction, this inefficiency proves adaptive for endothermic organisms that regulate myogenic heat to raise body temperatures at low air temperatures. Shivering is the most familiar and widespread example of this phenomenon, whereby contractions of muscles elevate body temperatures in animals ranging from honeybees to humans (Heinrich, 1993).

Because numerous flying insects activate their thoracic muscles at high frequency, they produce a substantial amount of heat during flight (Dudley, 2000). For the past 25 years, the prevailing view has been that flying insects are capable of regulating heat dissipation but not heat production (Casey, 1989; Heinrich, 1980). However, this perspective has been called into question by recent studies with honeybees (Harrison et al., 1996), centridine bees (Roberts et al., 1998) and dragonflies (May, 1995a,b) that suggest control of heat production *via* modulation of wingbeat kinematics. More specifically, these authors have hypothesized that insects increase wingbeat frequency to elevate body temperatures at low air temperatures.

Although support for in-flight regulation of heat production is growing, a number of issues remain unresolved (Harrison

and Fewell, 2002). To draw closure to this controversy, researchers have identified three lines for future investigation: complete analyses of wingbeat kinematics and heat production during flight (Roberts and Harrison, 1999), comparative investigations demonstrating the generality of the phenomenon (May, 1995a,b) and field-based tests representative of natural flight behavior (May, 1995a; Stevenson and Woods, 1997). Accordingly, we incorporated these suggestions in determining whether orchid bees (Apidae: Euglossini) regulate metabolic heat production during flight.

The flight energetics of orchid bees have been studied extensively in the past (Casey and May, 1985; May and Casey, 1983), and a recent re-analysis of data from these studies suggested that they regulate heat production during flight (May, 1995a). As a neotropical group, orchid bees may not encounter as great a range of air temperatures as do temperate-zone species but they are an ideal organism for flight studies because they will readily hover over floral fragrances located in the field of view of a video camera (Evoy and Jones, 1971). In the present study, we recorded wingbeat kinematics, carbon dioxide production and heat loss for *Euglossa imperialis* hovering in a screened insectary and wingbeat frequency alone for *Eg. imperialis* and five other orchid bee species hovering

in the field. These data support the hypothesis that orchid bees regulate metabolic heat production during flight *via* changes in wingbeat frequency and muscle efficiency.

## Materials and methods

### *Study site and animal*

*Euglossa imperialis* Cockerell is an abundant and widespread species of orchid bee from Central America (Roubik and Ackerman, 1987). It ranges from sea level up to 1500 m and can be captured throughout the year in a variety of habitats ranging from intact forest to open fields. During the early wet season of 2002, *Eg. imperialis* was captured at cineole fragrance baits from a lowland population in the Laboratory Clearing and Central Tower on Barro Colorado Island, Panama (BCI). *Eg. imperialis* is active at fragrance baits on dry days between 07.00 h and 14.00 h (Armbruster and Berg, 1994), making these times the primary period of data collection.

### *Wingbeat kinematics and mechanical power output*

Bees hovering at fragrance baits in the Laboratory Clearing were lured into a screened insectary and induced to hover in front of a handheld digital camcorder (Canon ZR10; 60 fields s<sup>-1</sup>; shutter speed 1/60 s), which was positioned to record wingbeat amplitude from the dorsal view of the animal. Bees hovered over a translucent plastic sheet, lit from behind to enhance contrast of images. A front surface mirror oriented at 45° with respect to the field of view provided a simultaneous image of stroke plane angle and body angle. After transferring suitable sequences to NIH Image, projected amplitude, stroke plane angle ( $\beta$ ) and body angle ( $\chi$ ) were measured at five frames during the sequence. Wingbeat amplitude ( $\Phi$ ) was obtained by dividing projected amplitude by the cosine of the stroke plane angle to correct for foreshortening. Wingbeat frequency (*WBF*) was recorded on the camcorder's audio track using an optical tachometer (Unwin and Ellington, 1979). A virtual instrument programmed in LabView (National Instruments, Austin, TX, USA) was used to filter out noise and estimate the fundamental frequency from 0.5 s determinations, which were then averaged over the duration of the flight sequence.

Following measurements of heat loss (see below), standard morphological parameters were determined for all insects (Ellington, 1984). Body mass ( $m_b$ ) and wing mass ( $m_w$ ) were measured to the nearest 0.0001 g using an analytical balance. Wing length ( $r$ ) was measured to the nearest 0.01 mm using digital calipers. Wing area ( $S$ ), wing loading ( $p_w$ ), wing aspect ratio ( $AR$ ) and non-dimensional radii for moments of wing area and virtual mass were determined from digital photos of wings. Non-dimensional moments of wing mass were taken from Dudley (1995).

Mass-specific mechanical power output was estimated from inertial ( $P^*_{acc}$ ), induced ( $P^*_{ind}$ ) and profile powers ( $P^*_{pro}$ ) using the hovering aerodynamic model of Ellington (1984) for the cases of perfect elastic energy storage ( $P^*_{per}$ ) and zero elastic energy storage ( $P^*_{zero}$ ). The mean lift coefficient ( $C_L$ )

was calculated using the mean force balance during hovering (Ellington, 1984), and the profile drag coefficient ( $C_D$ ) was estimated assuming a lift-to-drag ratio of 0.55 (Feuerbacher et al., 2003; Sane and Dickinson, 2001).

We used least-squares regressions to test if flight kinematics or mechanical power or both changed with temperature.

### *Metabolic power*

Following the filming of wingbeat kinematics, metabolic power was estimated using closed-system respirometry. Bees were placed in a 1 or 2 liter glass bottle equipped with an infrared carbon dioxide sensor (Vernier Software and Technology, Beaverton, OR, USA) accurate to 10% of the reading between 0 and 5000 p.p.m. CO<sub>2</sub>. Carbon dioxide concentration was sampled at a rate of 1 Hz using a Vernier LabPro 12-bit A-D converter connected *via* USB cable to an Apple Macintosh G3 Powerbook running Vernier LoggerPro software. Mass-specific metabolic rate ( $P^*_{met}$ ) was calculated from the slope of carbon dioxide concentration as a function of time, assuming a respiratory quotient of one and an energy equivalent of 21.4 J ml<sup>-1</sup> O<sub>2</sub>.

In spite of hovering abilities exhibited during kinematic trials, bees were reluctant to engage in continuous flight in the respirometry chamber. We categorize flight behavior during these experiments as 'agitated' because it was necessary to shake the chamber periodically to prolong flight periods (Harrison et al., 1996; Suarez et al., 1996). Only respirometry trials in which bees flew continuously for at least 2 min were included in our final data set. The purpose of these measurements was not to replicate the comprehensive gas-exchange studies of Roberts et al. (1998) or Roberts and Harrison (1999) but to complement our measurements of heat loss and wingbeat kinematics from freely hovering bees. Consequently, we derived independent estimates of heat production by subtracting mechanical power output from metabolic power input.

### *Power for heat production*

At equilibrium, metabolic heat production will equal the sum of radiative, convective and evaporative heat loss. Radiative and convective heat loss can be inferred from body segment temperatures following flight and the Newtonian cooling constants of freshly killed specimens (Heath and Adams, 1969; May, 1976; May and Casey, 1983). After at least 1 min of hovering, bees were captured in a hand net. An Omega mini-hypodermic copper-constantan thermocouple probe (outer diameter 0.2 mm) was sequentially inserted into the thorax, abdomen and head of the insect within 10 s following capture. Temperatures were recorded using an Omega 450 ATT temperature meter (Stamford, CT, USA) with 0.1°C resolution. The insect was killed in acetone fumes and brought to the lab for morphological measurements and determinations of cooling constants.

Body segment temperatures and *WBF* were also recorded from an additional 20 bees at the Central Tower and Laboratory clearings on BCI. Variation in heat transfer

between the thorax and the head or abdomen was investigated using the head temperature excess ratio:

$$R_h = (T_h - T_a)/(T_{th} - T_a), \quad (1)$$

where  $T_h$  is head temperature,  $T_a$  is air temperature and  $T_{th}$  is thoracic temperature, and the abdominal temperature excess ratio:

$$R_{ab} = (T_{ab} - T_a)/(T_{th} - T_a), \quad (2)$$

where  $T_{ab}$  is the abdominal temperature. According to the three-compartment model outlined by Stavenga et al. (1993),  $R_h$  or  $R_{ab}$  will be independent of  $T_a$  if heat transfer does not vary between the thorax and the respective segment. If insects actively dissipate heat from their thoraces at high  $T_a$ , then  $R_h$  or  $R_{ab}$  will increase with  $T_a$ . Conversely, if insects regulate their heads or abdomens above  $T_a$  at low  $T_a$  then  $R_h$  or  $R_{ab}$  should decrease with  $T_a$ .

The induced flow field around a hovering insect provides convective cooling in the absence of winds or forward flight speed. The magnitude of this downwash was calculated using the aerodynamic model of Ellington (1984), assuming uniform flow across all body segments. The primary orientation of flow with respect to the body was approximated as the sum of the body angle and the stroke plane angle. Preliminary experiments with two individuals oriented at 0, 30, 60 and 90° indicated that flow orientation exhibits the greatest influence on head and abdominal conductance measurements. Thoracic conductance did not appear to be sensitive to flow orientation. Based on kinematic analyses of 16 individuals, the angle between the body and the stroke plane was  $31.24 \pm 2.16^\circ$  (mean  $\pm$  95% C.I.). Insects filmed in flight were thus mounted on a thin metal rod and placed in the test section of a desktop wind tunnel (TSI Model 8392 Certifier; TSI Incorporated, St Paul, MN, USA; turbulence intensity 0.25%) at an angle of 30° with respect to oncoming flow. A mini-hypodermic thermocouple probe was inserted into the thorax, abdomen or head of the insect, and a fiber optic microscope lamp was used to warm the insect to 50°C. After cooling at least 5°C, temperatures were logged by hand every 20 s until segment temperature was within 1°C of air temperature. This procedure was repeated on each body segment at air speeds of 0, 1 and 2 m s<sup>-1</sup>. Air speed was measured using a calibrated hot-wire anemometer (TSI Incorporated). Following trials, head, abdomen and thorax (without wings or legs) were weighed using an analytical balance ( $\pm 1$  mg). Body segment masses were multiplied by a correction factor based on the ratio of total mass before cooling trials to the sum of the segment masses. The cooling constant,  $k$ , for each segment was calculated from the natural logarithm of the slope of the linear regression of temperature elevation *versus* time. Using data specific to each individual, we employed a regression model to estimate the cooling constants at the appropriate induced velocity. Non-evaporative heat loss was calculated as:

$$P_{\text{heat}} = k_{th}hm_{th}(T_{th} - T_a) + k_{ab}hm_{ab}(T_{ab} - T_a) + k_hhm_h(T_h - T_a), \quad (3)$$

where  $h$  is the specific heat of insect tissue (3.48),  $m_{th}$  is the thoracic mass,  $m_{ab}$  is the abdominal mass and  $m_h$  is the head mass (May and Casey, 1983). This simple model is useful as a first approximation but it disregards internal conductance due to hemolymph flow and assumes that heat is generated independently in the head, thorax and abdomen. More detailed approaches can be found in May (1995b) and Stavenga et al. (1993).

Mass-specific evaporative heat loss ( $P^*_{\text{evap}}$ ) was estimated using regression equations for another member of the family Apidae, *Apis mellifera* (Roberts and Harrison, 1999). Although *A. mellifera* is known to modulate evaporative cooling at extremely high temperatures (Heinrich, 1979; Roberts and Harrison, 1999), at temperatures below 35°C evaporative heat loss is consistent with data reported for the anthophorid bees *Centris pallida* (Roberts et al., 1998) and *Xylocopa capitata* (Nicolson and Louw, 1982). Based on our estimates, evaporative heat loss accounts for 6–7% of the total heat loss from a hovering *Eg. imperialis*, and errors in our extrapolations are unlikely to influence our major results.

We used a least-squares regression to test whether metabolic heat production declined with  $T_a$ .

#### Muscle efficiency

Muscle efficiency ( $\eta$ ) is the ratio of mechanical power output ( $P^*_{\text{mech}}$ ) divided by metabolic power input (Josephson et al., 2001):

$$\eta_{\text{met}} = P^*_{\text{mech}}/P^*_{\text{met}}. \quad (4)$$

Alternatively, efficiency can be calculated using  $P^*_{\text{mech}}$  in conjunction with heat loss measurements (Wakeling and Ellington, 1997):

$$\eta_{\text{heat}} = P^*_{\text{mech}}/(P^*_{\text{heat}} + P^*_{\text{evap}} + P^*_{\text{mech}}). \quad (5)$$

We calculated  $\eta$  using equations 2 and 3 for the cases of perfect and zero elastic energy storage and used these values to test whether  $\eta$  changes with  $T_a$ .

In the above calculations of muscle efficiency, we have assumed elastic energy storage to be constant but we will also consider the possibility of variable elastic energy storage in our Discussion. It is possible to calculate efficiency *via* subtraction using only respirometric and heat loss data:

$$\eta_{\text{subtraction}} = (P^*_{\text{met}} - P^*_{\text{heat}} - P^*_{\text{evap}})/P^*_{\text{met}}. \quad (6)$$

This efficiency estimate will be largely independent of Ellington's (1984) model and assumptions regarding both elastic energy storage and the lift-to-drag ratio. In effect, wingbeat kinematics are only used in estimating the induced flow velocity. Theoretically, the numerator of equation 6 should fall between  $P^*_{\text{per}}$  and  $P^*_{\text{zero}}$ , providing an indication of the degree of elastic energy storage. Unfortunately, because variance in the numerator was over two orders of magnitude greater than variance in  $P^*_{\text{per}}$  or  $P^*_{\text{zero}}$ , low statistical power compromised our ability to estimate elastic energy storage or test temperature trends using this efficiency estimate.

*Field measurement of wingbeat frequency*

Wingbeat frequencies for six species of orchid bees hovering at fragrance baits were recorded at field sites throughout Costa Rica (October 2002–January 2003) and at the Central Tower on Barro Colorado Island (June 2002): *Euglossa championi* Cheesman, *Euglossa imperialis*, *Euglossa purpurea* Friese, *Euglossa sapphirina* Moure, *Eulaema meriana* Olivier and *Eulaema cingulata* Fabricius. The genus *Euglossa* consists of smaller (<300 mg) glabrous bees whereas *Eulaema* tend to be larger (400–1000 mg), pubescent bees. An optical tachometer was used to record *WBF* on a portable cassette recorder (Sony TCM-20DV). Air temperature was measured using a handheld thermocouple shielded from the sun and, when bees were hovering in direct sunlight, operative temperature ( $T_{op}$ ) was also obtained from a thermocouple implanted in the corpse of a freshly killed bee (Armbruster and Berg, 1994). Operative temperature provides a rough metric for the convective and radiative heat environment experienced by a hovering bee although it does not take into account the contribution of air movements produced by the flapping wings. In addition, evaporative heat loss from our bee corpses may have led to an underestimate of  $T_{op}$ , but we feel these measurements are more useful than  $T_a$  because of variability in solar radiation at our field sites. After netting bees, body mass was measured using a portable microbalance ( $\pm 1$  mg).

Audio clips were transferred to a Macintosh G3 Powerbook with 16-bit resolution at a sampling rate of 44.1 kHz. A custom virtual instrument in LabView was used to electronically filter out noise and determine the fundamental frequency from a distribution of 0.1 s determinations (Fig. 1A,B). Least-squares regression was used to test whether *WBF* declined with  $T_a$  and  $T_{op}$ .

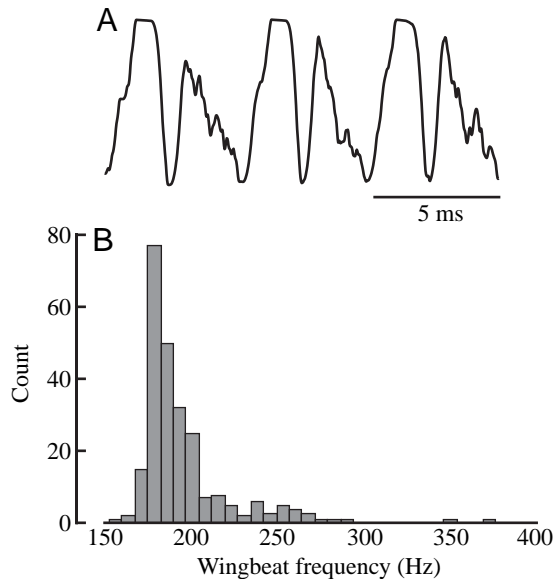

Fig. 1. (A) Filtered optical tachometer signal of three wingbeats from a *Euglossa imperialis* hovering over a chemical bait. (B) Histogram of wingbeat frequency determinations from the complete record sampled in A.

**Results***Body temperature and morphology*

Air temperatures during these experiments ranged from 24.9 to 33.2°C.  $T_{th}$ ,  $T_h$  and  $T_{ab}$  of *Eg. imperialis* increased with  $T_a$  (Fig. 2). The slope of  $T_{th}$  on  $T_a$  was significantly less than one, but  $T_h$  exhibited even greater stability than  $T_{th}$  (Fig. 2). The significant negative correlation between  $R_h$  and  $T_a$  suggests that the head is being actively thermoregulated *via* supplemental heat transfer at low  $T_a$  (Fig. 3).  $R_{ab}$  also showed a slight, but significant, decline with  $T_a$ , a finding that indicates that additional heat is also being transferred to the abdomen at low  $T_a$  (Fig. 3).

Mean body mass for *Eg. imperialis* on BCI was  $160.8 \pm 6.2$  mg (mean  $\pm$  95% C.I.). Mean wing loading was  $21.7 \pm 1.3$  N m<sup>-2</sup>. Neither body mass nor wing loading were significantly correlated with  $T_a$  ( $P > 0.1$ ). Cooling constants for all body segments increased with airspeed (Table 1).

*Kinematics and mechanical power output*

Out of 28 trials, complete respirometric, thermal and kinematic measurements were obtained for 13 *Eg. imperialis* individuals. For these 13 individuals filmed in the insectary, *WBF* declined with  $T_a$ , but this trend was not statistically significant (Fig. 4; Table 2). Further investigation using data

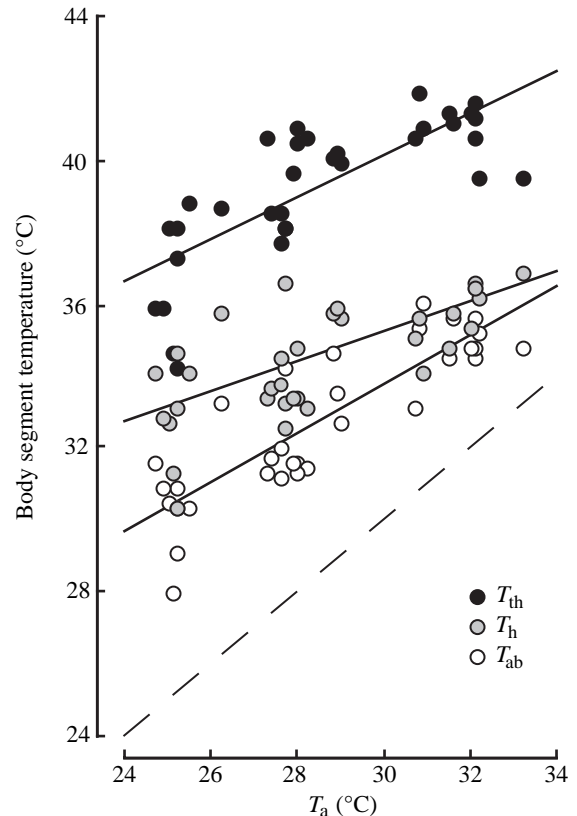

Fig. 2. Thorax ( $T_{th}$ ), head ( $T_h$ ) and abdomen ( $T_{ab}$ ) temperatures plotted against air temperature ( $T_a$ ) in hovering *Euglossa imperialis*. Least-squares regressions:  $T_{th}=0.574T_a+22.9$ ,  $r^2=0.596$ ,  $P<0.0001$ ;  $T_h=0.418T_a+22.6$ ,  $r^2=0.497$ ,  $P<0.0001$ ;  $T_{ab}=0.675T_a+13.5$ ,  $r^2=0.745$ ,  $P<0.0001$ .

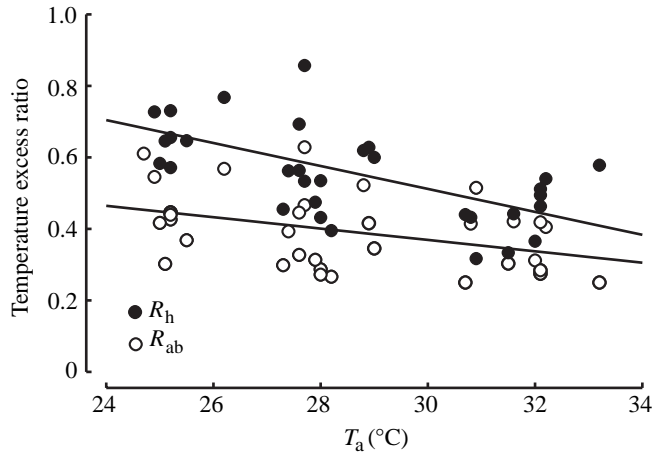

Fig. 3. Head temperature excess ratio ( $R_h$ ) and abdominal temperature excess ratio ( $R_{ab}$ ) decline with air temperature ( $T_a$ ) in hovering *Euglossa imperialis*. Least-squares regressions:  $R_{ab} = -0.016T_a + 0.846$ ,  $r^2 = 0.16$ ,  $P = 0.0213$ ;  $R_h = -0.032T_a + 1.475$ ,  $r^2 = 0.395$ ,  $P < 0.0001$ .

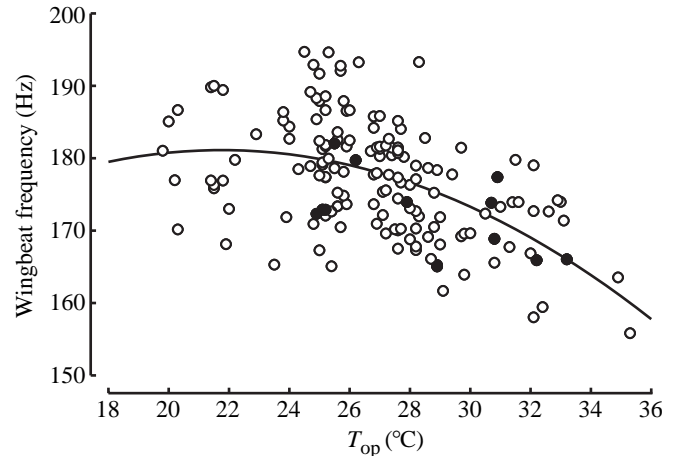

Fig. 4. Wingbeat frequency ( $WBF$ ) declines at higher operative temperatures ( $T_{op}$ ) in hovering *Euglossa imperialis* (13 experimental bees shown as filled circles; 139 additional bees from Costa Rica and Panama shown as open circles). Least-squares regression:  $WBF = -0.115T_{op}^2 + 5.00T_{op} + 127$ .

from 33 individuals from BCI and 126 individuals from Costa Rica provided statistical support for this trend (Fig. 4; BCI alone,  $P = 0.0024$ ; Costa Rica alone,  $P < 0.0001$ ).  $WBF$  declined from approximately 180 Hz at 20°C to 170 Hz at 34°C. A quadratic regression provided the best fit to the pooled data (Table 3).  $T_{th}$  was not significantly correlated with  $WBF$  ( $F_{1,32} = 2.380$ ,  $P = 0.1331$ ). However, the elevation of  $T_{th}$  over  $T_a$  did increase significantly with  $WBF$  (Fig. 5). No other kinematic parameters were significantly correlated with  $T_a$  (Table 3).

Mean induced velocity was  $1.85 \pm 0.08 \text{ m s}^{-1}$ . Mean mechanical power output was  $152 \text{ W kg}^{-1}$  assuming perfect elastic energy storage or  $197 \text{ W kg}^{-1}$  assuming zero elastic energy storage (Table 2). Neither estimate was correlated with  $T_a$  (Fig. 6; Table 2).

#### Flight metabolic rate, heat production and muscle efficiency

Mass-specific metabolic rate,  $P^*_{met}$ , and non-evaporative heat loss,  $P^*_{heat}$ , declined linearly with  $T_a$  (Fig. 6; Table 2). Metabolic heat production declined by 33% as  $T_a$  increased from 24 to 34°C. Subtracting mechanical power output from  $P^*_{met}$ , we calculated metabolic heat production to be  $705 \pm 85.5 \text{ W kg}^{-1}$  assuming zero elastic energy storage or  $751 \pm 85.7 \text{ W kg}^{-1}$  with perfect elastic energy storage. Neither of these values was significantly different from

$677 \pm 80.3 \text{ W kg}^{-1}$ , calculated by adding  $P^*_{evap}$  to  $P^*_{heat}$  ( $P > 0.1$ ). All three of these estimates declined significantly with  $T_a$  ( $P < 0.05$ ). We note that  $P^*_{heat}$  for individual #5 was greater than  $P^*_{met}$ , indicating an error in either one or both measurements. However, removal of this data point does not alter our primary conclusions. Mechanical power output estimated by subtraction ( $P^*_{met} - P^*_{heat} - P^*_{evap}$ ) was  $225 \pm 98.5 \text{ W kg}^{-1}$ , which was not significantly greater than either  $P^*_{per}$  or  $P^*_{zero}$  ( $P > 0.1$ ).

Muscle efficiency increased linearly with  $T_a$  (Fig. 7; Table 2). Mean muscle efficiency was 18% assuming perfect elastic energy storage and 22% assuming zero elastic energy storage (Table 2). Individual values for efficiency estimated by subtraction (equation 6) varied widely ( $-17$  to 47%), but the mean value, 24% (28% without the negative value calculated for individual #5), was only slightly higher than our other efficiency estimates (Table 2).

#### Comparative wingbeat frequency

In the six species of orchid bees studied,  $WBF$  scaled as  $m_b^{-0.29}$  ( $r^2 = 0.959$ ). In all six species,  $WBF$  declined significantly with  $T_{op}$  (Table 3; Figs 4, 8, 9) and  $T_a$  (results not shown). In the two species with the greatest sample size, *Eg. imperialis* and *Eg. purpurea*, a quadratic fit provided the best

Table 1. Newtonian cooling constants,  $k$ , for body segments of *Euglossa imperialis* at three airspeeds

| Airspeed ( $\text{m s}^{-1}$ ) | $k$ ( $\text{s}^{-1}$ ) |                     |                     |
|--------------------------------|-------------------------|---------------------|---------------------|
|                                | Thorax ( $N=13$ )       | Abdomen ( $N=12$ )  | Head ( $N=10$ )     |
| 0                              | 0.009 (0.008–0.010)     | 0.017 (0.016–0.019) | 0.022 (0.019–0.025) |
| 1                              | 0.015 (0.014–0.017)     | 0.031 (0.025–0.037) | 0.042 (0.036–0.047) |
| 2                              | 0.019 (0.017–0.020)     | 0.039 (0.031–0.048) | 0.068 (0.062–0.075) |

Values in parentheses are 95% confidence intervals for the means.

Table 2. Mean kinematics, aerodynamic coefficients, body mass-specific powers and efficiencies for 13 *Euglossa imperialis* individuals hovering in a screened insectary on Barro Colorado Island, Panama

|                                    | Mean | 95% C.I.   | $F_{1,12}$ | $P$   |
|------------------------------------|------|------------|------------|-------|
| WBF (Hz)                           | 173  | 169–176    | 4.37       | 0.061 |
| $\Phi$ (deg.)                      | 124  | 121–126    | 1.59       | 0.233 |
| $\beta$ (deg.)                     | 9.94 | 7.50–12.39 | 0.093      | 0.766 |
| $\chi$ (deg.)                      | 21.5 | 19.9–23.1  | 0.990      | 0.350 |
| $Re$                               | 1650 | 1540–1750  | 0.421      | 0.530 |
| $C_L$                              | 1.49 | 1.32–1.66  | 0.331      | 0.577 |
| $C_D$                              | 2.71 | 2.40–3.03  | 0.335      | 0.574 |
| $V_{ind}$ (m s <sup>-1</sup> )     | 1.85 | 1.77–1.93  | 2.12       | 0.173 |
| $P^*_{ind}$ (W kg <sup>-1</sup> )  | 18.2 | 17.4–19.1  | 2.64       | 0.135 |
| $P^*_{pro}$ (W kg <sup>-1</sup> )  | 133  | 128–138    | 0.068      | 0.800 |
| $P^*_{acc}$ (W kg <sup>-1</sup> )  | 82.1 | 69.8–94.5  | 0.188      | 0.673 |
| $P^*_{zero}$ (W kg <sup>-1</sup> ) | 197  | 191–203    | 0.002      | 0.963 |
| $P^*_{per}$ (W kg <sup>-1</sup> )  | 152  | 148–156    | 0.108      | 0.749 |
| $P^*_{met}$ (W kg <sup>-1</sup> )  | 903  | 819–986    | 10.5       | 0.012 |
| $P^*_{heat}$ (W kg <sup>-1</sup> ) | 634  | 553–716    | 9.06       | 0.012 |
| $P^*_{evap}$ (W kg <sup>-1</sup> ) | 44.7 | 35.8–53.5  | n/a        | n/a   |
| $\eta_{heat, zero}$ (%)            | 22.9 | 21.1–24.7  | 7.70       | 0.018 |
| $\eta_{met, zero}$ (%)             | 22.2 | 20.3–24.2  | 8.56       | 0.014 |
| $\eta_{heat, per}$ (%)             | 18.6 | 16.9–20.4  | 6.85       | 0.024 |
| $\eta_{met, per}$ (%)              | 17.1 | 15.6–18.6  | 10.5       | 0.008 |
| $\eta_{subtraction}$ (%)           | 24.1 | 14.8–33.4  | 0.16       | 0.696 |

$F$ -statistic and  $P$ -values are the results of a linear regression for a given parameter on air temperature. Profile drag coefficients were estimated using a lift-to-drag ratio of 0.55 (Sane and Dickinson, 2001). For definitions, see text and List of symbols.

fit to the observed data (Figs 4, 9), with WBF remaining relatively constant at  $T_{op}$  between 20 and 25°C and declining above 25°C.

WBF declined between 4 and 9% (mean 6%) as  $T_{op}$  increased from 24 to 34°C. Percent change in WBF was not correlated with body mass ( $P>0.1$ ).

### Discussion

Results from this study support the hypothesis that hovering orchid bees regulate metabolic heat production via modulation

Table 3. Mean body mass, mean wingbeat frequency (range), sample size and least-squares regression statistics for equations describing the relationship between wingbeat frequency and operative temperature for six species of euglossine bees hovering over chemical baits in Costa Rica and Panama

| Species               | $m_b$ (mg) | WBF (Hz)      | $N$ | $r^2$  | $F$  | $P$     |
|-----------------------|------------|---------------|-----|--------|------|---------|
| <i>Eg. sapphirina</i> | 65         | 211 (190–224) | 60  | 0.140  | 9.41 | 0.033   |
| <i>Eg. purpurea</i>   | 97         | 223 (199–236) | 103 | 0.228* | 14.8 | <0.0001 |
| <i>Eg. championi</i>  | 106        | 191 (178–204) | 16  | 0.306  | 6.18 | 0.0261  |
| <i>Eg. imperialis</i> | 158        | 177 (156–195) | 159 | 0.272* | 29.1 | <0.0001 |
| <i>El. cingulata</i>  | 545        | 128 (118–135) | 19  | 0.274  | 6.41 | 0.0215  |
| <i>El. meriana</i>    | 962        | 99 (90–108)   | 33  | 0.248  | 10.2 | 0.0032  |

\*Quadratic equation.

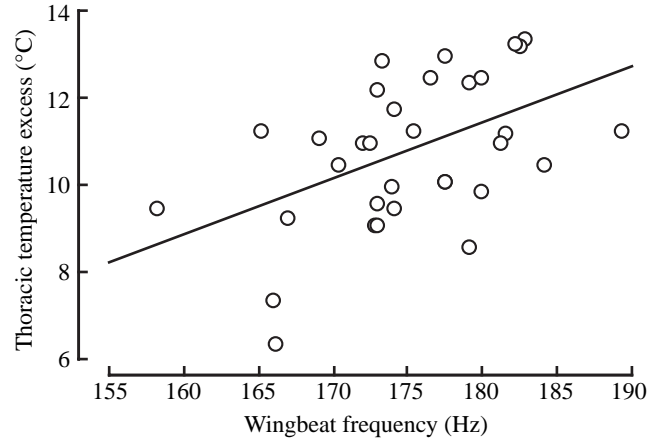

Fig. 5. Thoracic temperature excess increases linearly with wingbeat frequency (WBF) in hovering *Euglossa imperialis*. Least-squares regression:  $T_{excess}=0.128WBF-11.6$ ,  $r^2=0.240$ ,  $P=0.0038$ .

of wingbeat frequency. Our conclusions are based on kinematic, thermal and respirometric measurements from a single species, *Euglossa imperialis*, and wingbeat frequency recordings from five additional species. Both metabolic and heat loss measurements indicate that heat production in *Eg. imperialis* increases by 33% as air temperature decreases by 10°C. These results are close to values measured for *Centris pallida* (Roberts et al., 1998) but higher than the 20–25% increase estimated for *Apis mellifera* (Harrison et al., 1996; Roberts and Harrison, 1999). Moffatt (2001) found that foraging metabolic rate (flight and feeding) in *A. mellifera* varies with both air temperature and sucrose reward rate, recording up to a 50% drop in metabolic rate with an increase of 10°C. Previous data from *Eg. imperialis* suggested a decline between 20 and 30% (May and Casey, 1983), values that fall within the 95% confidence intervals for our regression estimates. We suggest that the ability to regulate metabolic heat production is a widespread feature of the corbiculate bees but caution that no study to date has actually demonstrated a metabolic response of an individual insect subjected to a range of thermal environments as has been shown in hummingbirds (Chai et al., 1998).

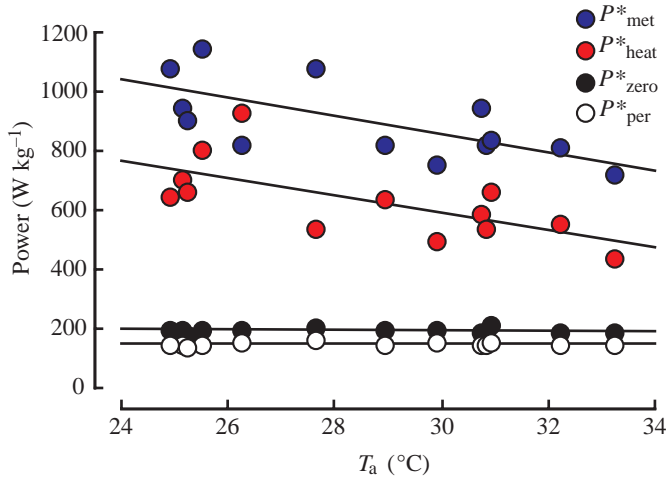

Fig. 6. Metabolic power ( $P^*_{\text{met}}$ ), non-evaporative heat loss ( $P^*_{\text{heat}}$ ) and mechanical power output ( $P^*_{\text{zero}}$  and  $P^*_{\text{per}}$ ) plotted against air temperature ( $T_a$ ) in hovering *Euglossa imperialis*. The equation for metabolic rate is:  $P^*_{\text{met}} = -30.6T_a + 1780$ . The equation for heat loss is:  $P^*_{\text{heat}} = -29.9T_a + 1490$ .

In comparison with pubescent bees (e.g. *Bombus*, *Eulaema*), *Euglossa* is a relatively poor thermoregulator (Roberts and Harrison, 1998). The slope of  $T_{\text{th}}$  on  $T_a$  for *Eg. imperialis* is closer to 1 than to 0, which led previous authors to classify tropical bees as thermoconformers rather than thermoregulators (Heinrich, 1993). The present findings demonstrate that *Eg. imperialis* regulates heat production at low air temperatures, and we suggest that its poor thermoregulatory ability is largely a consequence of its small size and lack of pubescent insulation. In *Bombus* and *Eulaema*, pubescence substantially lowers the convective cooling constant (Heinrich, 1993; May and Casey, 1983), but when these bees encounter high temperatures their thick pile

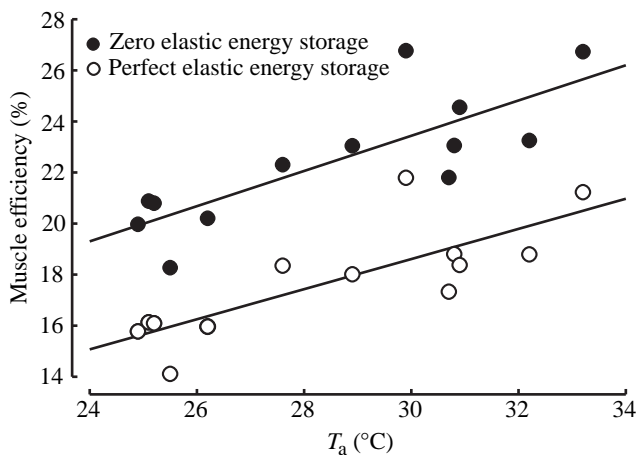

Fig. 7. Muscle efficiency ( $\eta$ ) increases with air temperature ( $T_a$ ) in hovering *Euglossa imperialis*. Data points are mean values for each individual from respirometry and heat loss experiments. The equation for the least-squares regression line assuming perfect elastic energy storage is  $\eta = 0.006T_a + 0.009$  and for zero elastic energy storage is  $\eta = 0.007T_a + 0.027$ .

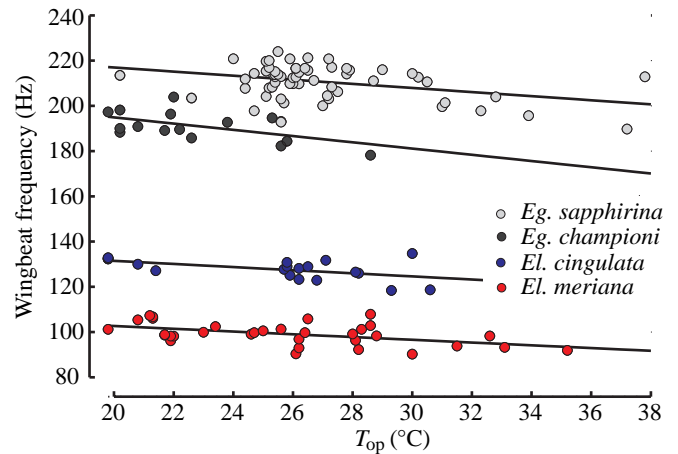

Fig. 8. Wingbeat frequency declines linearly with operative temperature in four species of orchid bees hovering in the field.

becomes a liability and they must shunt excess heat to their abdomens (Roberts and Harrison, 1998). By contrast, *Apis*, *Centris* and *Euglossa* all possess a countercurrent exchange mechanism limiting the dissipation of thoracic heat to the abdomen (Wille, 1958). This anatomical constraint suggests that the modulation of heat production will play a critical role in thoracic temperature regulation by these bees. Curiously, our data indicated that the abdominal excess ratio declined with ambient temperature, but this appears to be a rather anomalous finding in light of previous research on orchid bees (May and Casey, 1983) and other bees (Roberts et al., 1998; Roberts and Harrison 1999).

An additional reason why the slope of  $T_{\text{th}}$  on  $T_a$  may be so steep in *Euglossa* is that these bees warm their heads at the expense of their flight muscles. We found that *Eg. imperialis* regulates  $T_{\text{h}}$  by augmenting heat transfer to the head at low  $T_a$ . Modulation of heat transfer between the head and thorax has also been demonstrated in the bee *Centris pallida* and the

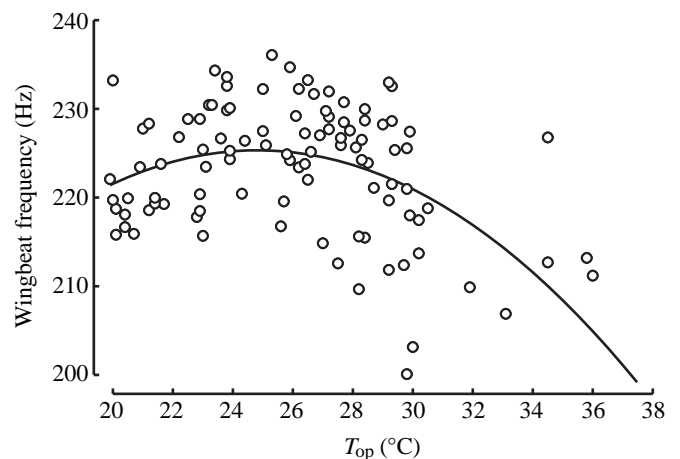

Fig. 9. Wingbeat frequency (WBF) declines at higher operative temperatures ( $T_{\text{op}}$ ) in hovering *Euglossa purpurea*. Least-squares regression:  $WBF = -0.163T_{\text{op}}^2 + 8.09T_{\text{op}} + 125$ .

dragonfly *Anax junius*, but the hypothesized function of this ability is not to dissipate excess heat from the thorax but to optimize cephalic neural functioning (Roberts et al., 1998; May, 1995b). We conclude from our measurements of body segment temperatures that the stability of both  $T_h$  and  $T_{th}$  during flight at low  $T_a$  is achieved by variation in heat production not heat dissipation.

Wingbeat frequency in orchid bees declines with air temperature while muscle efficiency increases with air temperature. Unfortunately, kinematic data from our 13 experimental bees proved inadequate for identifying compensatory mechanisms by which bees maintain constant body weight support across a range of wingbeat frequencies. Ruby-throated hummingbirds compensate for declining frequency at high temperatures by increasing the amplitude of wing motions (Chai et al., 1998). In the present study, we found no evidence for compensatory changes in wingbeat amplitude, which is not surprising given the variety of lift-generating mechanisms available to flying insects (Dickinson et al., 1999; Srygley and Thomas, 2002).

The modulation of wingbeat frequency observed in orchid bees was consistent with recent data from other insects that regulate heat production during flight. For *Eg. imperialis*, an increase of 10°C results in a 6% decline in wingbeat frequency. *A. mellifera* shows an 8% drop over the same temperature range, and *C. pallida* declines by almost 14% (Harrison et al., 1996; Roberts and Harrison, 1998). Wingbeat frequency of two species of dragonflies declined by an average of 18% as heat production dropped by almost 60% (May, 1995a). Interestingly, in many of the bees examined to date (*Euglossa*, *Centris* and *Apis*), wingbeat frequency appears to exhibit a two-phase relationship with air temperature, suggesting that wingbeat frequency may be maximized at air temperatures below 25°C.

In contrast to flying bees and dragonflies, most insects show a positive relationship between wingbeat frequency and air temperature (Oertli, 1989). In beetles, this phenomenon is manifested as a positive relationship between frequency and thoracic temperature (Oertli, 1989). Oertli (1989) argues convincingly that the temperature sensitivity of wingbeat frequency is a consequence of the resonant properties of the thorax. The present data demonstrate that thoracic temperature does not influence wingbeat frequency in orchid bees, rather modulation of frequency influences thoracic temperature elevation. Indeed, work loop experiments with asynchronous flight muscle indicate that heat production increases when muscles are activated above their usual contraction frequencies (Josephson et al., 2001). With our experimental methods, we were unable to distinguish whether changes in muscle efficiency represent a shift in the biochemical efficiency of muscle contraction (Baker and Thomas, 2000; Maughan and Vigoreaux, 1999) or in the amount of elastic energy stored by the thorax during the deceleration phase of the wing stroke (Dickinson and Lighton, 1995; Ettema, 2001; Roberts et al., 1998). Metabolic heat production increased by over 200 W kg<sup>-1</sup> as temperature decreased by 10°C. Assuming a

constant efficiency of 20%, a complete shift from perfect elastic energy storage to zero elastic energy storage would result in a 45 W kg<sup>-1</sup> increase in mechanical power requirements and a >200 W kg<sup>-1</sup> increase in metabolic power. Alternatively, if elastic energy storage remains constant, then efficiency must decrease by approximately 6% to account for this 200 W kg<sup>-1</sup> increase. Further work is needed to identify the physiological and biochemical mechanisms by which heat production may be decoupled from useful aerodynamic work.

Because enzyme function is highly temperature dependent, physiological and biochemical processes may be optimized through temperature specialization (Hochachka and Somero, 1984). One hypothesis for specializing at high temperatures is that it may reduce the threat of overheating during strenuous activities such as locomotion (Heinrich, 1977). Animals that are adapted to operate at high body temperatures must possess a mechanism to warm themselves at cooler temperatures. Flying bees accomplish this task by beating their wings at elevated frequencies.

#### List of symbols

|              |                                                                                    |
|--------------|------------------------------------------------------------------------------------|
| $\Phi$       | stroke amplitude                                                                   |
| $\beta$      | stroke plane angle                                                                 |
| $\chi$       | body angle                                                                         |
| $\eta$       | muscle efficiency                                                                  |
| $AR$         | wing aspect ratio                                                                  |
| $C_D$        | coefficient of drag                                                                |
| $C_L$        | coefficient of lift                                                                |
| $h$          | specific heat of insect tissue                                                     |
| $k$          | Newtonian cooling constant of the thorax, head or abdomen                          |
| $m_b$        | body mass                                                                          |
| $m_{th}$     | thoracic mass                                                                      |
| $m_h$        | head mass                                                                          |
| $m_{ab}$     | abdominal mass                                                                     |
| $m_w$        | wing mass                                                                          |
| $P^*_{acc}$  | body mass-specific inertial power                                                  |
| $P^*_{evap}$ | body mass-specific evaporative heat loss                                           |
| $P^*_{heat}$ | body mass-specific non-evaporative heat loss                                       |
| $P^*_{ind}$  | body mass-specific induced power                                                   |
| $P^*_{mech}$ | body mass-specific mechanical power output                                         |
| $P^*_{met}$  | body mass-specific metabolic power                                                 |
| $P^*_{per}$  | body mass-specific mechanical power output assuming perfect elastic energy storage |
| $P^*_{pro}$  | body mass-specific profile power                                                   |
| $P^*_{zero}$ | body mass-specific mechanical power output assuming zero elastic energy storage    |
| $P_{heat}$   | non-evaporative heat loss                                                          |
| $p_w$        | wing loading                                                                       |
| $r$          | wing length                                                                        |
| $R_{ab}$     | abdominal temperature excess ratio                                                 |
| $Re$         | Reynolds number of the wing chord                                                  |
| $R_h$        | head temperature excess ratio                                                      |
| $S$          | wing area                                                                          |
| $T_a$        | air temperature                                                                    |



|           |                       |
|-----------|-----------------------|
| $T_{ab}$  | abdominal temperature |
| $T_h$     | head temperature      |
| $T_{op}$  | operative temperature |
| $T_{th}$  | thoracic temperature  |
| $V_{ind}$ | induced velocity      |
| $WBF$     | wingbeat frequency    |

We thank Robert Dudley for his thoughtful advice and support during the course of this study. Charles Darveau, Sagiri Horisawa, William Woods, the Biomechanics Group at UC Berkeley and two anonymous reviewers also provided valuable input during the preparation of this manuscript. David Roubik assisted us in identifying our specimens, and Douglas Altshuler kindly allowed us to use his spreadsheet to calculate moments of wing area. We acknowledge the logistical support provided by the Smithsonian Tropical Research Institute, the Organization for Tropical Studies, and the Arthropods of La Selva Project. This study was funded by an NSF Graduate Fellowship and a Frank and Fern Blair Fellowship from UT Austin to B.J.B.

## References

- Armbruster, W. S. and Berg, E. E.** (1994). Thermal ecology of male euglossine bees in a tropical wet forest: fragrance foraging in relation to operative temperature. *Biotropica* **26**, 50-60.
- Baker, J. E. and Thomas, D. D.** (2000). A thermodynamic muscle model and a chemical basis for A.V. Hill's muscle equation. *J. Muscle Res. Cell Motil.* **21**, 335-344.
- Casey, T. M.** (1989). Oxygen consumption during flight. In *Insect Flight* (ed. G. J. Goldsworthy and C. H. Wheeler), pp. 257-272. Boca Raton, FL: CRC Press.
- Casey, T. M. and May, M. L.** (1985). Flight energetics of euglossine bees in relation to morphology and wing stroke frequency. *J. Exp. Biol.* **116**, 271-289.
- Chai, P., Chang, A. C. and Dudley, R.** (1998). Flight thermogenesis and energy conservation in hovering hummingbirds. *J. Exp. Biol.* **201**, 963-968.
- Dickinson, M. H., Lehman, F.-O. and Sane, S. P.** (1999). Wing rotation and the aerodynamic basis of insect flight. *Science* **284**, 1954-1960.
- Dickinson, M. H. and Lighton, J. R. B.** (1995). Muscle efficiency and elastic storage in the flight motor of *Drosophila*. *Science* **268**, 87-90.
- Dudley, R.** (1995). Extraordinary flight performance of orchid bees (Apidae: Euglossini) hovering in heliox (80% He/20% O<sub>2</sub>). *J. Exp. Biol.* **198**, 1065-1070.
- Dudley, R.** (2000). *The Biomechanics of Insect Flight: Form, Function, and Evolution*. Princeton: Princeton University Press.
- Ellington, C. P.** (1984). The aerodynamics of hovering insect flight. I-VI. *Proc. R. Soc. Lond. B* **305**, 1-181.
- Ettema, G. J. C.** (2001). Muscle efficiency: the controversial role of elasticity and mechanical energy conversion in stretch-shortening cycles. *Eur. J. Appl. Physiol.* **85**, 457-464.
- Evoy, W. H. and Jones, B. P.** (1971). Motor patterns of male euglossine bees evoked by floral fragrances. *Anim. Behav.* **19**, 583-588.
- Feuerbacher, E., Fewell, J. H., Roberts, S. P., Smith, E. F. and Harrison, J. F.** (2003). Effects of load type (pollen or nectar) and load mass on hovering metabolic rate and mechanical power output in the honey bee *Apis mellifera*. *J. Exp. Biol.* **206**, 1855-1865.
- Harrison, J. F. and Fewell, J. H.** (2002). Environmental and genetic influences on flight metabolic rate in the honey bee, *Apis mellifera*. *Comp. Biochem. Physiol. A* **133**, 323-333.
- Harrison, J. F., Fewell, J. H., Roberts, S. P. and Hall, H. G.** (1996). Achievement of thermal stability by varying metabolic heat production in flying honeybees. *Science* **274**, 88-90.
- Heath, J. E. and Adams, P. A.** (1969). Temperature regulation and heat production in insects. In *Experiments in Physiology and Biochemistry*, vol. 2 (ed. G. A. Kerkut), pp. 275-293. New York: Academic Press.
- Heinrich, B.** (1977). Why have some animals evolved to regulate a high body temperature? *Am. Nat.* **111**, 623-640.
- Heinrich, B.** (1979). Keeping a cool head: honeybee thermoregulation. *Science* **205**, 1269-1271.
- Heinrich, B.** (1980). Mechanisms of body-temperature regulation in honeybees, *Apis mellifera* L. Regulation of thoracic temperature at high air temperatures. *J. Exp. Biol.* **85**, 73-87.
- Heinrich, B.** (1993). *The Hot-Blooded Insects*. Cambridge, MA: Harvard University Press.
- Hill, A. V.** (1938). The heat of shortening and the dynamic constants of muscles. *Proc. R. Soc. Lond. B* **126**, 136-195.
- Hochachka, P. W. and Somero, G. N.** (1984). *Biochemical Adaptation*. Princeton: Princeton University Press.
- Josephson, R. K., Malamud, J. G. and Stokes, D. R.** (2001). The efficiency of asynchronous flight muscle from a beetle. *J. Exp. Biol.* **204**, 4125-4139.
- Maughan, D. W. and Vigoreaux, J. O.** (1999). An integrated view of insect flight muscle: genes, motor molecules, and motion. *News Physiol. Sci.* **14**, 87-92.
- May, M. L.** (1976). Thermoregulation and adaptation to temperature in dragonflies (Odonata: Anisoptera). *Ecol. Monogr.* **46**, 1-32.
- May, M. L.** (1995a). Dependence of flight behavior and heat production on air temperature in the green darner dragonfly *Anax junius* (Odonata: Aeshnidae). *J. Exp. Biol.* **198**, 2385-2392.
- May, M. L.** (1995b). Simultaneous control of head and thoracic temperature by the green darner dragonfly *Anax junius* (Odonata: Aeshnidae). *J. Exp. Biol.* **198**, 2373-2384.
- May, M. L. and Casey, T. M.** (1983). Thermoregulation and heat exchange in euglossine bees. *Physiol. Zool.* **56**, 541-551.
- Moffatt, L.** (2001). Metabolic rate and thermal stability during honeybee foraging at different reward rates. *J. Exp. Biol.* **204**, 759-766.
- Nicolson, S. W. and Louw, G. N.** (1982). Simultaneous measurement of evaporative water loss, oxygen consumption, and thoracic temperature during flight in a carpenter bee. *J. Exp. Zool.* **222**, 287-296.
- Oertli, J. J.** (1989). Relationship of wing beat frequency and temperature during take-off flight in temperate-zone beetles. *J. Exp. Biol.* **145**, 321-338.
- Roberts, S. P. and Harrison, J. F.** (1998). Mechanisms of thermoregulation in flying bees. *Am. Zool.* **38**, 492-502.
- Roberts, S. P. and Harrison, J. F.** (1999). Mechanisms of thermal stability during flight in the honeybee *Apis mellifera*. *J. Exp. Biol.* **202**, 1523-1533.
- Roberts, S. P., Harrison, J. F. and Hadley, N. F.** (1998). Mechanisms of thermal balance in flying *Centris pallida* (Hymenoptera: Anthophoridae). *J. Exp. Biol.* **201**, 2321-2331.
- Roubik, D. W. and Ackerman, J. D.** (1987). Long-term ecology of euglossine orchid-bees (Apidae: Euglossini) in Panama. *Oecologia* **73**, 321-333.
- Sane, S. P. and Dickinson, M. H.** (2001). The control of flight force by a flapping wing: lift and drag production. *J. Exp. Biol.* **204**, 2607-2626.
- Srygley, R. B. and Thomas, A. L. R.** (2002). Unconventional lift-generating mechanisms in free-flying butterflies. *Nature* **420**, 660-664.
- Stavenga, D. G., Schwering, P. B. W. and Tinbergen, J.** (1993). A three-compartment model describing temperature changes in tethered flying blowflies. *J. Exp. Biol.* **185**, 325-333.
- Stevenson, R. D. and Woods, W. A.** (1997). Honeybee thermoregulation. *Science* **276**, 1015-1016.
- Suarez, R. K., Lighton, J. R. B., Joos, B., Roberts, S. P. and Harrison, J. F.** (1996). Energy metabolism, enzymatic flux capacities, and metabolic flux rates in flying honeybees. *Proc. Natl. Acad. Sci. USA* **93**, 12616-12620.
- Unwin, D. M. and Ellington, C. P.** (1979). An optical tachometer for measurement of the wing-beat frequency of free-flying insects. *J. Exp. Biol.* **82**, 377-378.
- Wakeling, J. M. and Ellington, C. P.** (1997). Dragonfly flight III. Lift and power requirements. *J. Exp. Biol.* **200**, 583-600.
- Wille, A.** (1958). A comparative study of the dorsal vessel of bees. *Ann. Entomol. Soc. Am.* **51**, 538-546.
